# Supplementary material for: Differences found in patient profiles and incidence trends between migrants and native-born Tuberculosis patients in Ireland; 2011-2021
Source: Research Square preprint supplement (doi:10.21203/rs.3.rs-6469195/v1), 2025-05-09
Supplement: Supplementary file 1 [file db84cd7f229ac6c42f57e1a8.docx]

## **Supplementary materials:**


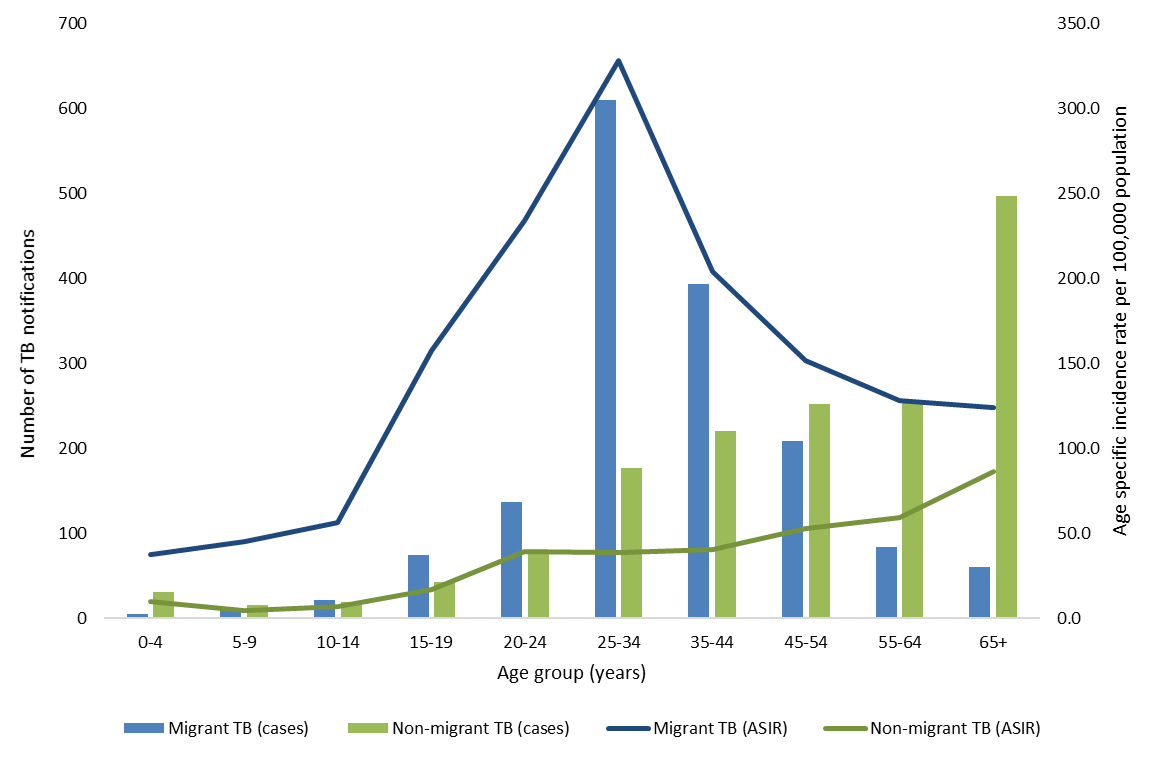


#### **Figure S1**: Cumulative number of TB patients and age-specific incidence rate per 100, 000 population by migrant status


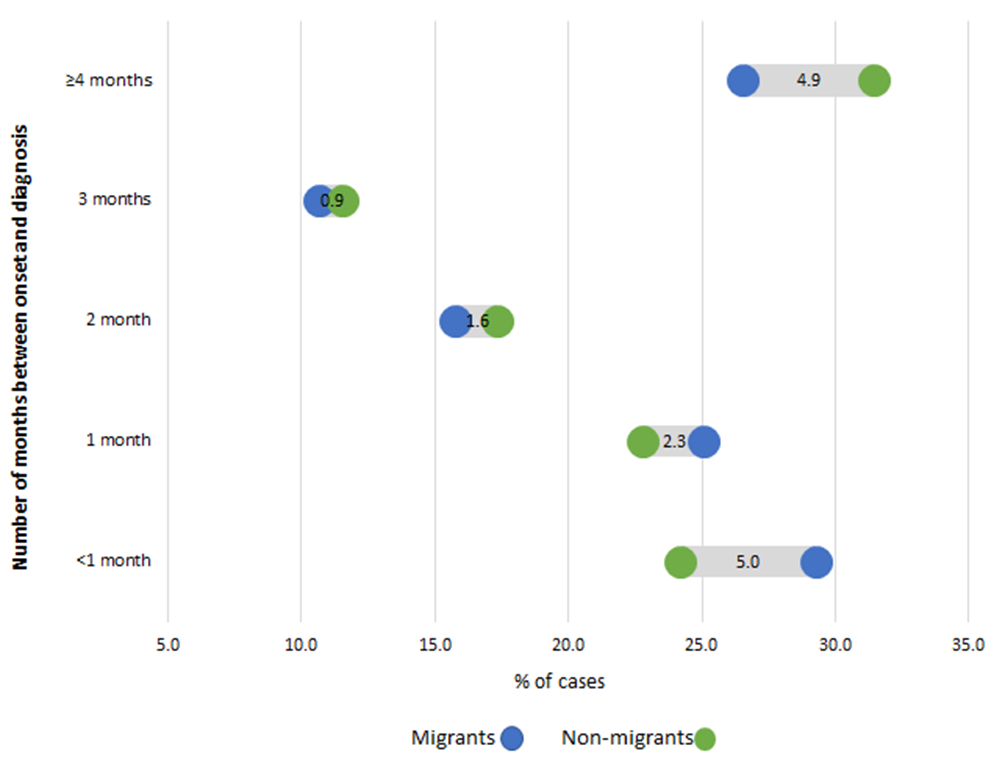


#### **Figure S2:** Interval between onset and diagnosis in months by migrant status for TB patients in Ireland


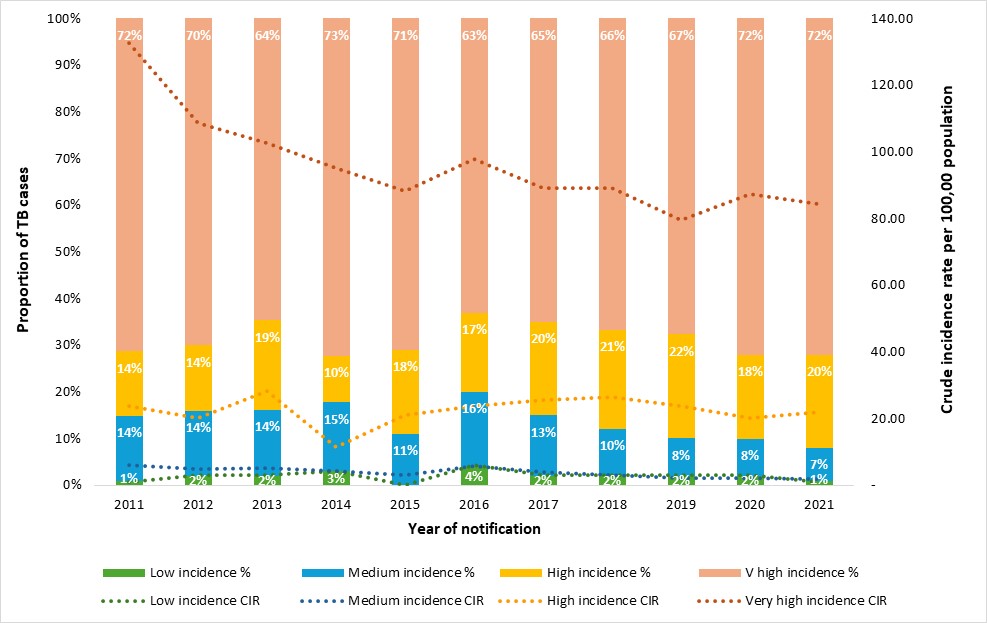


#### **Figure S3**: Annual proportion and crude incidence rates by WHO incidence categories for migrants with TB in Ireland

#### Table S1: Characteristics of migrants with TB by WHO incidence estimate category[[1]](#footnote-1), Ireland

| **Characteristic** | **WHO TB incidence category** | | | | | **p-value[[2]](#footnote-2)** |
| --- | --- | --- | --- | --- | --- | --- |
| **Overall**  N = 1,602 | **Low**  N = 30 | **Medium**  N = 193 | **High**  N = 280 | **Very high**  N = 1,099 |
| **Median age (years), (IQR)** | 34.0 (16.0) | 43.5 (25.5) | 36.0 (23.3) | 35.0 (16.0) | 33.0 (15.0) | **<0.001** |
| *(% missing)* | 0.1 | 0 | 0.5 | 0 | <0.1 |  |
| **Sex** |  |  |  |  |  | **0.035** |
| *Female* | 687 (43%) | 11 (37%) | 74 (39%) | 104 (37%) | 498 (45%) |  |
| *Male* | 911 (57%) | 19 (63%) | 118 (61%) | 176 (63%) | 598 (55%) |  |
| *(% missing)* | 0.2 | 0 | 0.5 | 0 | 0.3 |  |
| **International Protection Applicant** | |  |  |  |  | **<0.001** |
| *No* | 1,088 (88%) | 24 (100%) | 155 (95%) | 194 (93%) | 715 (85%) |  |
| *Yes* | 148 (12%) | 0 (0%) | 8 (4.9%) | 14 (6.7%) | 126 (15%) |  |
| *(% missing)* | 23 | 20 | 16 | 26 | 23 |  |
| **People living with HIV** |  |  |  |  |  | 0.20 |
| *Negative* | 711 (87%) | 13 (93%) | 73 (91%) | 129 (91%) | 496 (85%) |  |
| *Positive* | 106 (13%) | 1 (7.1%) | 7 (8.8%) | 13 (9.2%) | 85 (15%) |  |
| *(% missing)* | 49 | 53 | 59 | 49 | 47 |  |
| **Disease site** |  |  |  |  |  | **<0.001** |
| *Pulmonary* | 916 (58%) | 24 (80%) | 157 (82%) | 204 (73%) | 531 (49%) |  |
| *Extrapulmonary* | 667 (42%) | 6 (20%) | 35 (18%) | 75 (27%) | 551 (51%) |  |
| *(% missing)* | 1.2 | 0 | 0.5 | 0.4 | 1.5 |  |
| **Outbreak associated** |  |  |  |  |  | **0.021** |
| *Not linked to outbreak* | 1,527 (95%) | 27 (90%) | 177 (92%) | 266 (95%) | 1,057 (96%) |  |
| *Outbreak associated* | 75 (4.7%) | 3 (10%) | 16 (8.3%) | 14 (5.0%) | 42 (3.8%) |  |
| *(% missing)* | 0 | 0 | 0 | 0 | 0 |  |
| **Previous TB screening in Ireland** | |  |  |  |  | 0.072 |
| *No* | 1,042 (89%) | 22 (100%) | 136 (90%) | 192 (92%) | 692 (87%) |  |
| *Yes* | 134 (11%) | 0 (0%) | 15 (9.9%) | 17 (8.1%) | 102 (13%) |  |
| *(% missing)* | 27 | 27 | 22 | 25 | 28 |  |
| **Previous TB diagnosis)** |  |  |  |  |  | 0.14 |
| *No* | 1,097 (92%) | 22 (96%) | 136 (93%) | 180 (88%) | 759 (93%) |  |
| *Yes* | 92 (7.7%) | 1 (4.3%) | 11 (7.5%) | 24 (12%) | 56 (6.9%) |  |
| *(% missing)* | 26 | 23 | 24 | 27 | 26 |  |
| **First line drug resistance** | |  |  |  |  | 0.94 |
| *Sensitive* | 1,017 (83%) | 16 (80%) | 125 (84%) | 192 (82%) | 684 (83%) |  |
| *Resistant* | 213 (17%) | 4 (20%) | 24 (16%) | 42 (18%) | 143 (17%) |  |
| *(% missing)* | 23 | 33 | 23 | 16 | 25 |  |
| **M/XDR-TB** |  |  |  |  |  | **0.038** |
| *No* | 1,187 (97%) | 20 (100%) | 141 (95%) | 220 (94%) | 806 (97%) |  |
| *Yes* | 43 (3.5%) | 0 (0%) | 8 (5.4%) | 14 (6.0%) | 21 (2.5%) |  |
| *(% missing)* | 23 | 33 | 23 | 16 | 25 |  |

1. WHO incidence estimates were not available for two countries, Kosovo (n=2 patients) and Reunion (n=1 patient), in the Irish dataset. [↑](#footnote-ref-1)
2. Kruskal-Wallis rank sum test; Pearson's Chi-squared test; Fisher's exact test [↑](#footnote-ref-2)
